# Supplementary material for: Global chromatin mobility induced by a DSB is dictated by chromosomal conformation and defines the HR outcome
Source: PubMed Central journal article supplement (PMC9489209; doi:10.7554/elife.78015), 2022-09-20

# Fig. 1E

60h

**Control**

**Damage**

WT C PRS

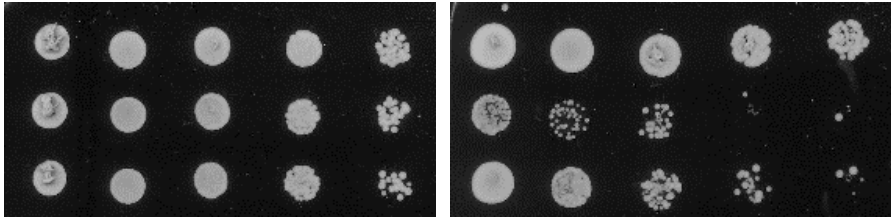

WT C Pb

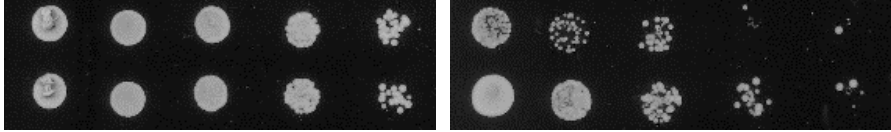

WT C Cen

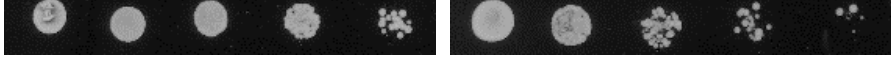

WT L PRS

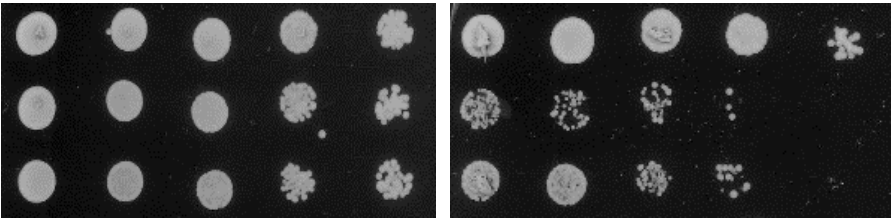

WT L Pb

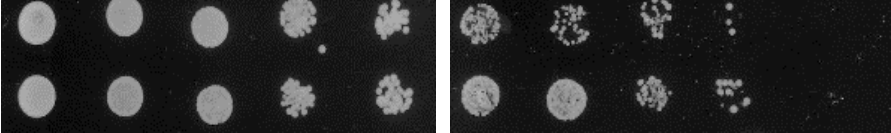

WT L Cen

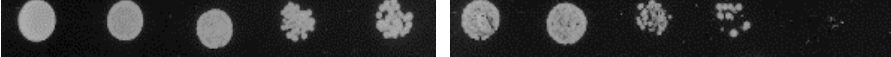

WT S PRS

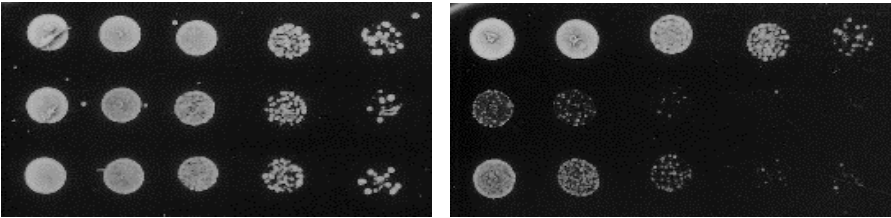

WT S Pb

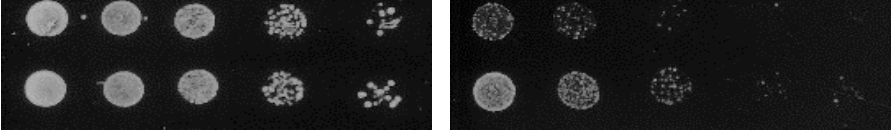

WT S Cen

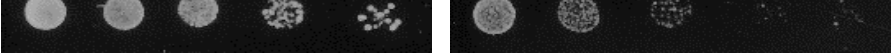

Supplement: elife-78015-fig1-data1.pdf [file elife-78015-fig1-data1.pdf]
