# Supplementary material for: Global chromatin mobility induced by a DSB is dictated by chromosomal conformation and defines the HR outcome
Source: eLife journal article supplement (doi:10.7554/elife.78015), 2022-09-09
Supplement: fig1-figsupp1-data1 [file F1S1SFD1.xlsx]

## Sheet: Feuil1
GROWTH CURVE
STRAIN		1ST TIME
	time (min)	0	45	90	135	180	225	270	315	360	405	450	495
YEF1454	OD	0.53	0.67	1.2	1.31	1.55	1.81	2.21	2.66	3.3	3.64	4.1	4.35
YEF1203	OD	0.42	0.47	0.89	0.96	1.2	1.34	1.7	2.06	2.55	2.91	3.65	3.65
YEF1205	OD	0.56	0.6	1.06	1.24	1.47	1.73	2.08	2.44	2.93	3.34	3.71	4.08
		2ND TIME
	time (min)	0	45	90	135	180	225	270	315	360	405	450	495
YEF1454	OD	0.48	0.52	0.64	0.65	0.83	0.98	1.2	1.52	1.7	2.1	2.6	2.61
YEF1203	OD	0.64	0.57	0.71	0.75	0.96	1.08	1.31	1.6	1.87	2.18	2.8	3.1
YEF1205	OD	0.48	0.46	0.52	0.67	0.97	1.24	1.54	1.95	2.42	2.66	3.45	3.8
		3TH TIME
	time (min)	0	45	90	135	180	225	270	315	360	405	450	495
YEF1454	OD	0.6	0.71	0.83	0.97	1.13	1.34	1.58	1.8	2.12	2.81	3.2	3.8
YEF1203	OD	0.6	0.72	0.85	1.02	1.23	1.35	1.64	1.8	2.18	2.81	3.11	3.83
YEF1205	OD	0.62	0.75	0.89	1.01	1.28	1.46	1.85	2.1	2.5	3.2	3.4	4.3
		MEAN
	time (min)	0	45	90	135	180	225	270	315	360	405	450	495
YEF1454	OD	0.54	0.63	0.89	0.98	1.17	1.38	1.66	1.99	2.37	2.85	3.3	3.59
YEF1203	OD	0.55	0.59	0.82	0.91	1.13	1.26	1.55	1.82	2.2	2.63	3.19	3.53
YEF1205	OD	0.55	0.6	0.82	0.97	1.24	1.48	1.82	2.16	2.62	3.07	3.52	4.06
		ST DV
	time (min)	0	45	90	135	180	225	270	315	360	405	450	495
YEF1454	OD	0.0602771	0.100167	0.284781	0.330051	0.361663	0.416213	0.510131	0.594082	0.829538	0.770779	0.754983	0.889401
YEF1203	OD	0.117189	0.125831	0.0945163	0.141774	0.147986	0.15308	0.21	0.230651	0.340441	0.395769	0.430155	0.380307
YEF1205	OD	0.0702377	0.145029	0.276104	0.286764	0.252389	0.245425	0.270986	0.251064	0.274287	0.359073	0.166433	0.250599
DOUBLING TIME (min)
	1ST TIME						2ND TIME						3TH TIME
	YEF1454	YEF1203	YEF1205				YEF1454	YEF1203	YEF1205				YEF1454	YEF1203	YEF1205
real time / hours	8	8	8			real time / hours	8	8	8			real time / hours	8	8	8
real final conc / 10^5 / mL	652.5	547.5	612			real final conc / 10^5 / mL	391.5	465	570			real final conc / 10^5 / mL	570	574.5	645
real time / min	480	480	480			real time / min	480	480	480			real time / min	480	480	480
real factor	8.2	8.7	7.3			real factor	5.4	4.8	7.9			real factor	6.3	6.4	6.9
real divisions	3	3.1	2.9			real divisions	2.4	2.3	3			real divisions	2.7	2.7	2.8
real doubling time	158.1	153.9	167.5			real doubling time	196.5	210.9	160.8			real doubling time	180.3	179.5	171.8
	1st time	2nd time	3th time	Mean	St dv
YEF1454	158.05	196.48	180.25	178.26	19.2921
YEF1203	153.87	210.88	179.49	181.413	28.5536
YEF1205	167.54	160.8	171.79	166.71	5.54181
YEF1454= YEF1202#2
