# Supplementary material for: Global chromatin mobility induced by a DSB is dictated by chromosomal conformation and defines the HR outcome
Source: eLife journal article supplement (doi:10.7554/elife.78015), 2022-09-09
Supplement: fig1-figsupp1-data2 [file F1S1SD2.xlsx]

## Sheet: Feuil1
20180119	YEF1205				Mean fold induction	Std Dev
				1	6.74176	1.71074
				3	5.07013	1.4968
		Fold induction		6	4.26487	0.0104517
	30min	1.67018		o/n	2.44673	1.09071
	1h	4.37717
	3h	4.15544
	O/N	3.43426
20180126	YEF1205
		Fold Induction
	t0	1
	t30min	8.78474
	t1h	8.22491
	t3h	6.79748
	6h	4.25748
20180201	YEF1205
		Fold induction
	t0	1
	30min	7.01285
	1h	6.63456
	3h	4.25748
	6h	4.27226
	O/N	2.62989
20180220	YEF1205
		Mean induction Fold
		-donor
	1h	7.73041
	O/N	1.27603
