# Supplementary material for: Global chromatin mobility induced by a DSB is dictated by chromosomal conformation and defines the HR outcome
Source: eLife journal article supplement (doi:10.7554/elife.78015), 2022-09-09
Supplement: fig1-figsupp1-data3 [file F1S1SD3.xlsx]

## Sheet: Feuil1
YEF1202
		N Red Cells	N Total Cells	N Red Cells/N Total Cells	% Red Cells	mean	St dv
1ST TIME	-DSB'	18	119	0.151261	15.1261	12.2447	4.07488
	-DSB + dCen	110	118	0.932203	93.2203	95.7226	3.53873
2ND TIME	-DSB'	25	267	0.093633	9.3633
	-DSB + dCen	166	169	0.982249	98.2249
