# Supplementary material for: Global chromatin mobility induced by a DSB is dictated by chromosomal conformation and defines the HR outcome
Source: eLife journal article supplement (doi:10.7554/elife.78015), 2022-09-09
Supplement: fig1-figsupp1-data5 [file fddff1ba-1d6b-4cb6-a760-2b0babf7065a.xlsx]

## Sheet: Feuil1
YEF1019	YAS002	YEF1248
0.57567	0.781084	0.235069
0.277458	1.1144	0.145956
0.203742	0.303102	0.530463
0.103379	0.264451	0.222728
0.361831	1.05112	0.328523
0.322841	0.993158	0.134864
0.297766	0.608546	0.759429
0.377879	0.654188	0.38198
0.266609	1.35914	0.400323
0.59879	0.0899155	0.21895
0.464186	0.961924	0.0976035
0.274747	0.961432	0.210474
0.143555	0.825266	0.83387
0.790487	0.884052	0.624984
0.432598	0.577266	0.0828402
0.23393	0.828509	0.536909
0.235681	0.343676	0.767402
1.22018	0.828842	0.465908
0.642602	0.319671	0.296834
0.143938	0.541522	0.308056
0.525437	0.398565	0.0976216
0.402142	0.668782	0.141671
0.284402	0.580395	0.272421
0.445571	0.353425	0.61287
0.34364	1.07447	0.133883
0.409108	0.76131	0.382431
0.20797	0.47455	0.237375
0.222782	1.02464	0.522406
0.144709	1.43235	0.293869
0.170983	0.893969	0.277967
0.649067	0.731882	0.99452
0.32768	0.947079	0.267767
0.510538	0.861619	0.385185
0.35789	0.422935	0.386751
0.304765	1.09305	0.286823
0.359968	0.764737	0.236318
0.245472	0.255806	0.272478
0.422581	0.99264	0.292019
0.308059	0.465665	0.218159
0.302919	1.28647	0.217082
0.314644	1.22261	0.359829
0.3579	0.588716	0.574816
0.925932	0.784414	0.205155
0.954201	0.54241	0.12269
0.295897	0.418738	1.14061
0.518588	0.786502	0.229164
0.304231	0.747178	0.2418
0.168395	0.670013	0.0359808
0.31866	0.683829	0.193342
0.289951	0.541446	0.190164
0.208351	0.648837	0.195455
0.17683	0.825544	0.478848
0.0841407	1.08518	0.255212
0.348156	0.298358	0.296766
0.583671	0.59139	0.882165
0.924741	0.859251	0.0332242
0.409386	1.09084	0.273881
0.442377	0.46885	0.257777
0.947619	1.06343	0.3562
0.215797	1.02476	1.05083
0.335808	0.735995	0.323747
0.120087	0.782809	0.352354
0.378577	0.835289	0.79535
0.586711	0.272809	0.756063
0.789499	0.77812	0.304076
0.314808	0.318461	0.471917
0.246814	0.862884	0.316361
0.914723	0.718976	0.244438
0.771719	0.280232	0.819645
0.25595	1.00654	1.4108
0.54541	1.10129	1.12373
0.648781	1.19978	0.363061
0.492402	1.27067	0.187975
0.47404	0.719875	0.458804
0.298238	0.486413	0.293648
0.28279	0.54897	0.377056
0.104397	0.772023	0.63965
0.423764	0.985267	0.27683
0.298874	0.758085	0.12062
0.101017	0.872332	0.322162
0.310667	1.19535	0.174451
0.821121	0.887524	0.492863
0.198962	0.874047	0.0223086
0.327495	0.212331	0.519126
0.107858	0.517307	0.383961
0.022341	1.03957	0.14958
0.241028	0.790436	0.322064
0.283881	0.199726	0.541258
0.133372	0.429534	0.510216
0.251216	0.22362	0.235784
0.696864	0.963701	0.828886
0.305424	0.58089	0.489783
0.289358	0.487378	0.246965
0.396187	0.49599	0.298417
0.44558	0.739803
0.32378	0.590419	0.789983
0.0595608	0.663534	0.410777
0.131568	1.06309	0.771287
0.371331	1.03269	0.34222
0.267384	0.44288	0.158224
0.349103	0.9195	0.313042
0.339855	0.992253	1.39023
0.393979	0.942925	0.417309
0.354777	0.190807	0.513938
0.353811	1.00461	0.24411
0.380768	0.865157	0.2977
0.325944	1.08401	0.46637
0.201428	0.941064	0.467862
0.391394	0.80114	0.139708
0.291607	0.66348	0.38354
0.231542	0.116876	0.570109
0.284819	0.968239	0.55952
0.136664	0.831478	0.352467
0.43234	0.782428	0.162052
0.299535	0.929375	0.353059
0.629934	0.754989	0.247138
0.475067	0.340543	0.0829653
0.231362	0.517	0.12321
0.443571	0.770996	0.338689
0.602839	0.859592	0.39938
0.784627	0.348166	0.384174
0.507451	0.429341	0.270548
0.222981	1.03757	0.339358
0.772638	0.595434	0.28064
0.717928	1.27288	0.274876
0.362651	0.533121	0.238483
0.304752	0.884372	0.144209
0.243504	0.844382	0.246352
0.423379	0.663648	0.320286
1.07407	0.477938	0.477534
0.184563	1.23498	0.173788
0.244559	0.746979	0.39473
0.359881	0.912664	0.451731
0.25663	0.95353	0.682021
0.90014	0.877303	0.194595
0.285431	1.00346	0.257777
0.304595	0.263691	0.256526
0.736464	1.0341	0.933805
0.301536	0.4982	0.22868
0.73953	0.98189	0.281221
0.308089	0.551215	0.208708
0.652881	0.357315	0.173645
0.648463	1.04129	0.298363
0.113894	0.959279	0.667973
0.394161	0.953069	0.201333
0.421507	0.9393	0.272866
0.153267	0.863957	1.01689
0.624467	0.359816	1.24039
0.445818	0.425833	0.494213
0.125876	0.320012	0.524017
0.331062	0.841065	0.350313
0.361401	0.787746	0.385613
0.34267	0.46414	0.294009
0.173206	0.597742	0.0885273
0.295182	0.602012	0.275824
0.818021	0.946454	0.315567
0.166574	0.707262	0.252248
0.250832	0.506632	1.12498
0.206188	0.571859	0.875291
0.531332	0.920739	0.060381
0.2387	1.0112	0.277788
0.323595	0.782937	0.317164
0.450982	0.346521	0.224924
0.595373	0.900591	0.299969
0.147716	0.700156	0.208028
0.542	0.454454	0.191927
0.247898	0.749908	0.354181
0.191993	1.16669	1.37302
0.494698	0.952257
1.11526	0.688889
0.0623571	0.783855
0.282191	0.678506
0.635299	0.977268
0.130079	0.624019
0.368088	0.6839
0.333518	0.309045
0.477692	0.960786
0.236806	0.931399
0.239899	0.575026
0.668199	0.714011
0.265354	1.11568
0.93502	0.546949
0.140901	0.744244
0.324867	0.611481
0.14189	0.621255
0.32064	1.38393
0.184389	0.715599
0.246251	0.554519
0.602564	0.577024
0.096756	0.914978
0.496796	0.613913
0.217871	0.762385
0.761894	0.823892
0.284446	0.052057
0.0861496	0.72178
0.223911	0.171227
0.258744	0.788603
0.593907	0.500536
0.40808	0.338721
0.268154	0.293165
0.626403	1.17446
0.325364	1.04626
0.515015	0.87443
0.37315	0.78089
0.0462025	1.06087
0.633962	0.882011
0.4394	0.677956
0.273016	1.12679
0.243583	0.739969
0.186106	0.541122
0.49679	0.996264
0.698806	1.34145
0.188305	0.302613
0.887957	0.98428
0.206388	0.821825
0.250352	0.517673
1.05209	0.914371
0.564675	0.844916
0.411365	0.200102
0.525646	0.649319
0.44628	1.10807
0.497628	0.945326
0.30424	0.304254
0.159668	0.868628
0.357895	0.863187
0.328738	0.920433
0.610477	0.265807
0.371799	0.731046
0.382145	0.873447
0.687934	0.480446
0.190751	0.659845
0.580415	1.14348
0.33717	0.80116
0.308883	0.558931
0.515775	0.795001
0.858266	0.682086
0.265939	0.831909
0.160053	1.13347
0.35054	0.814181
0.316617	0.237808
0.201941	0.703651
0.239313	0.7213
0.511323	0.632609
0.36381	0.628768
0.184628	0.461312
0.138077	0.826147
0.297566	0.663182
0.67562	0.544179
0.178948	0.749596
0.277243	0.512023
0.302801	1.10299
0.75657	0.903391
0.589301	1.13759
0.299386	0.415265
0.293668	0.989746
0.117498	0.835603
0.0779226	1.29146
0.784483	1.01141
0.402448	0.819724
0.195594	0.660512
0.198147	0.929017
0.277839	0.348528
0.438272	0.831777
0.44213	1.12844
0.40804	0.837689
0.771659	1.36849
0.202612	0.816319
0.58445	1.04278
0.40126	1.05615
0.478422	0.436657
0.290816	0.911476
0.366174	0.734546
0.676418	0.926799
0.288808	0.988413
0.327601	1.04745
0.118943	0.370914
0.150774	1.06744
0.327681	0.389358
0.288308	0.245651
0.308317	0.0949454
0.232431	0.821049
0.553508	0.224635
0.467586	1.24071
0.300731	1.03334
0.819324	0.735602
0.638442	0.850445
0.428463	0.548696
0.513243	0.546325
0.460185	0.933809
0.637588	0.676449
0.336378	1.00432
0.29747	0.741476
0.0798315	1.06879
0.288528	0.737115
0.198556	0.18348
0.400378	1.02051
0.27962	0.57739
0.299649	0.411053
0.249498	0.997962
0.305269	1.04898
0.233881	0.965989
0.937616	0.502579
0.321396	1.04118
0.233393	0.961445
0.303117	0.847725
0.407061	0.861849
0.399387	0.91315
0.286157	0.988248
0.485503	0.683712
0.367801	1.31799
0.252057	0.878004
0.206976	1.00318
0.358999	0.63582
0.400854	0.714566
0.616894	1.27425
0.178852	0.131672
0.583541	1.11909
0.516959	0.607533
0.365075	1.00784
0.269429	1.10063
0.397918	0.32425
0.381047	0.549565
0.446816	0.579679
0.320237	0.707393
0.285661	0.467571
0.27927	0.474206
0.618531	0.212961
0.14443	1.07551
0.284886	1.05148
0.227548	0.143442
0.701628	0.926126
0.222884	1.13828
0.33044	0.396196
0.205116	0.85712
0.882059	0.964415
0.34632	0.666339
0.501993	0.706194
0.210528	0.829584
0.379611	0.944081
0.27844	0.826853
0.666572	0.584092
0.548502	1.02243
0.444703	0.913726
0.726771	1.06802
0.306224	0.823333
0.291676	0.55854
0.162199	0.286802
0.668036	1.10349
0.124867	0.344074
0.570109	1.47448
0.955309	0.131397
0.308355	0.269539
0.105483	0.127179
0.19725	0.630445
0.317768	0.789757
0.277609	0.961234
0.368029	1.04002
0.220942	0.997984
0.814984	1.08441
0.252374	0.783054
0.371482	1.15246
0.399054	0.797232
0.190606	1.37358
0.344579	1.01902
0.615141	0.940943
0.289097	0.850785
0.367276	0.248521
0.373377	0.860124
0.463579	0.942028
0.501223	0.68454
0.493156	0.663081
0.0886171	0.883351
0.22911	1.05221
0.288222	0.496144
0.16863	0.861371
0.119944	0.17657
0.552419	0.414699
0.343821	0.366602
0.167424	0.925389
0.366977	0.86276
0.722768	0.738962
0.704652	0.555548
0.607475	1.05801
1.08793	0.943912
0.180351	0.17173
0.396297	0.971443
0.64902	0.633127
0.351614	0.726577
0.28923	0.552305
0.151428	0.835925
0.293198	1.1989
0.333012	1.00417
0.250711	1.00628
0.213239	1.19501
0.270379	1.35189
0.443137	0.72755
0.166209	1.0275
0.262394	0.56083
0.231001	0.719221
0.375907	0.795773
0.274742	0.623011
0.26488	0.443515
0.211354	1.08168
0.560052	0.734434
0.369693	1.2237
0.509319	0.613583
0.317554	0.96633
0.404923	0.815963
0.8723	0.808262
0.394578	0.372925
0.348955	0.677002
0.42412	1.40629
0.402399	0.694714
0.374426	0.532532
0.429298	0.510649
0.330604	0.567216
0.29717	0.334048
0.553686	0.898705
0.376442	0.960675
0.167857	0.530205
0.488258	0.366442
0.435262	0.892393
0.401384	0.540038
0.490505	1.22661
0.177309	1.03074
0.21261	0.72991
0.628089	0.945668
0.911028	0.464664
0.213755	0.659459
0.660455	0.850344
0.413806	0.970162
0.449866	1.01144
0.31651	0.77293
0.453226	0.654986
0.778718	0.779486
0.523955	0.820204
0.404816	1.183
0.612443	0.796743
0.474467	0.944679
0.178208	1.1652
0.49956	1.2129
0.631524	0.384191
0.438721	0.456453
0.149127	0.859723
0.837091	0.603058
0.396396	1.10837
0.516805	0.344657
0.925629	0.736514
0.368726	0.9955
1.11771	1.06176
0.808436	0.609072
0.458364	0.547587
0.314442	1.02102
0.752969	0.885609
0.412522	0.359831
0.253856	0.431783
0.372959	0.359306
0.371606	0.71105
0.0221183	0.558118
0.547302	0.452016
0.762881	0.830168
0.53448	1.09957
0.463284	0.472365
0.418613	1.15117
0.118295	0.829851
0.343079	0.916607
0.349681	0.895834
0.460957	0.549716
0.910645	0.289285
0.42878	0.888357
0.410663	0.665285
0.327884	0.257292
0.383483	1.00544
0.299652	0.196347
0.531734	0.546464
0.576068	0.498011
0.643447	0.716755
0.279248	0.77318
0.228007	0.705513
0.352165	0.473927
0.812145	1.03679
0.15333	0.928407
0.291236	0.796878
0.106838	0.882251
0.141297	0.59918
0.613778	0.54622
0.332655	0.630577
0.334963	1.19116
0.27842	0.823784
0.993331	0.873549
0.396338	0.594793
0.215864	1.06044
0.330614	0.384888
0.378448	0.25048
0.238382	1.18873
0.683896	1.01143
0.691781	0.909108
0.411723	0.763791
0.245197	0.670473
0.293775	0.561474
0.54622	0.705265
0.348429	0.763958
0.599446	0.807977
0.286155	0.293017
0.455555	0.894971
0.918411	0.282196
0.0766229	1.15874
0.260836	0.579349
0.494191	0.839113
0.285331	1.15867
0.348125	0.645189
0.376998	0.442924
0.740272	0.948347
0.371566	0.319586
0.263195	0.375254
0.685137	0.64943
0.564402	1.10522
0.550642	0.896063
0.478364	1.24035
0.293805	0.686289
0.310747	0.910592
0.317263	0.465722
0.865126	0.736073
0.11801	0.386353
0.520771	0.276053
0.35343	1.45996
0.399438	0.43877
0.858401	0.612691
0.330036	1.00862
0.438659	1.03915
0.44366	1.06638
0.731185	0.894181
0.255928	0.919583
0.768875	0.613222
0.338478	0.650257
0.217132	0.832206
0.378364	0.387722
0.367389	1.13445
0.363589	0.814194
0.45397	0.664277
0.213538	0.682723
0.226092	0.65454
0.355325	1.02583
0.2306	1.30485
0.798648	0.626585
0.324409	0.952331
0.0158621	0.855813
0.284844	1.17842
0.230369	0.996782
0.562981	0.882738
0.807406	0.264273
0.464846	1.0915
0.257113	0.791836
0.860176	1.163
0.206934	0.907284
0.259918	0.999747
0.198018	0.739702
0.228966	0.732073
0.329484	0.97356
0.426875	1.03821
0.619318	0.545488
0.0760708	0.963303
0.382226	0.275066
0.502814	0.609816
0.422685	1.08486
0.30005	1.06187
0.342307	0.801881
0.207658	0.507249
0.192136	0.422234
0.877129	0.381753
0.475527	0.717502
0.243303	0.741741
0.110278	0.170276
0.302902	1.16558
0.141185	0.52559
0.81062	1.21179
0.26895	0.291196
0.162026	0.727012
0.245446	0.38431
0.435021	1.08737
0.226162	0.527331
0.287827	0.360759
0.251503	0.322961
0.286935	0.431028
0.306558	0.475419
0.231291	0.279645
0.212074	0.744271
0.456173	0.772985
0.307861	0.653634
0.210237	0.947657
0.581845	0.740766
0.674241	0.560909
0.129876	0.519625
0.200264	0.400731
0.541027	0.281788
0.270223	0.674379
0.279297	0.6919
0.515744	0.757794
0.543395	0.0854826
0.392698	0.431731
0.239476	0.277214
0.216304	0.929781
0.247455	0.701057
1.0915	1.00909
0.790897	0.282665
0.32897	0.513331
0.475352	0.578
0.110869	0.169994
0.403443	0.385091
0.296976	1.07845
0.427968	0.495877
0.693375	0.959676
0.042253	1.18159
0.243577	0.340615
0.218386	0.806991
0.275723	1.09532
0.333048	0.782829
0.318586	0.9599
0.295536	0.318504
0.360407	0.426883
0.638342	0.366827
0.450022	0.867714
0.159647	1.1265
0.122507	0.853725
0.133571	0.222285
0.421389	0.401169
0.377048	0.180318
0.704793	0.493242
0.182099	1.05399
0.356738	0.982018
0.290164	0.418123
0.293695	0.605946
0.202457	1.20854
0.17847	0.654738
0.216511	0.991194
0.353049	0.668054
0.207506	0.685147
0.776172	0.863816
0.301832	0.857261
0.348883	1.17569
0.379959	0.704186
0.270772	1.36908
0.12679	1.04813
1.26961	0.214299
0.414924	1.07208
0.563516	0.735212
0.863264	0.67741
0.330481	0.335669
0.646413	0.982167
0.378004	1.36802
0.125366	0.761613
0.477686	0.48166
0.536112	0.454966
0.419967	0.417071
0.129585	0.0218262
0.292998	0.412773
0.505893	0.757079
0.312644	0.618589
0.382478	0.969566
0.390621	0.591079
0.557834	0.586677
0.221415	0.674675
0.324068	0.465612
0.944367	1.18242
0.225775	0.5654
0.784818
0.551126	0.684942
0.327119	0.574917
0.112325	0.563043
0.772783	0.832461
0.160882	0.610369
0.517605	1.04865
0.100427	1.17984
0.300444	0.571942
0.496304	0.712949
0.449251	0.979736
0.277759	1.16043
0.268183	1.17621
0.294819	0.519668
0.233109	1.20176
0.166724	0.633246
0.243849	0.939469
0.670662	0.99763
0.288455	0.937983
1.05843	0.989696
0.316384	0.922926
0.332906	0.971099
0.680687	0.759597
0.726855	0.245928
0.347032	0.326154
0.115357	0.6131
0.410809	0.837686
0.199214	0.693771
0.516068	0.887503
0.371907	0.566498
0.450111	0.791557
0.430878	0.583821
0.228371	1.17656
0.214404	1.14897
0.103284	1.13336
0.333298	0.614022
0.654234	0.185524
0.124477	0.597509
0.370824	0.567535
0.770794	0.380075
0.994575	0.90498
0.391241	1.18781
0.590532	0.832458
0.275445	0.916025
0.0947526	0.490497
0.217887	0.775984
0.486404	0.314129
0.303254	0.73796
0.252366	0.790256
0.38889	0.401912
0.689462	0.654417
0.196539	1.14474
0.594365	0.710932
0.310307	1.01875
0.320952	1.21106
0.128747	1.17772
0.5643	0.625552
0.275308	0.797262
0.391746	0.496055
0.707713	0.499098
0.668452	0.757662
0.429321	0.975143
0.541689	0.414
0.523154	0.48804
0.217925	0.995228
0.368414	0.776058
0.240304	0.420712
0.841815	0.933879
0.475297	0.184364
0.363702	1.31655
0.152678	1.00083
0.312481	0.74765
0.541451	0.513272
0.327329	0.494117
0.131966	0.925257
0.41657	1.212
0.353535	0.722057
0.224946	1.15596
0.952634	0.537178
0.422404	0.683753
0.300978	0.759977
0.310623	1.04214
0.65214	0.568097
0.302815	0.532609
0.298341	0.802396
0.447954	0.0818549
0.536173	0.502484
0.276442	0.832082
0.610439	0.266934
0.323108	0.561868
0.457475	0.993856
0.214571	1.06014
0.695165	0.385078
0.434335	0.0708511
0.306994	0.353491
0.422137	0.851548
0.677007	0.816249
0.305278	0.849865
0.579654	1.01953
0.120246	0.723398
0.33463	0.90828
0.274982	1.01682
0.301372	0.963559
0.215428	1.14233
0.399174	0.99419
0.553851	0.434844
0.341497	0.894276
0.332518	0.932351
0.51635	0.48782
0.476153	0.556592
0.326747	0.728707
1.03213	0.353998
0.449032	0.334025
0.606237	0.977662
0.322764	0.734965
0.43206	0.876925
1.04097	1.14399
0.288908	1.10389
0.11366	0.944419
0.278484	0.434043
0.413569	1.0252
0.238814	0.298265
0.205052	0.420339
0.652491	1.1055
0.448317	0.428612
0.336711	0.541076
0.403703	0.529866
0.282159	0.957004
0.0485119	0.561531
0.179891	0.542775
0.478615	0.585312
0.289348	0.345024
0.611986	0.234402
0.527096	0.241985
0.343333	0.728806
0.484633	0.554548
0.175033	0.769134
0.282151	0.846109
0.407953	0.913915
0.742534	1.00162
0.222109	0.848243
0.234559	0.206357
0.334025	0.634224
0.958441	0.19349
0.361172	0.909246
0.379612	0.742086
0.291641	1.11265
0.243305	0.12042
0.733891	0.61788
0.838215	0.94862
0.73739	0.696864
0.246193	0.10882
0.861235	0.718451
0.602708	1.02349
0.508216	0.447692
0.549749	1.25894
0.950413	0.750836
0.241575	0.0365266
0.317194	0.879153
0.552522	0.782148
0.342439	1.04441
0.38958	1.11259
0.143674	0.546472
0.298026	0.426012
0.282694	0.973082
0.35791	0.800605
0.291048	1.23522
0.383695	0.250831
0.341804	0.325205
0.302531	0.193077
0.831507	0.964805
0.373694	0.722205
0.54556	0.824311
0.743192	0.130938
0.422822	0.929362
0.38852	1.02012
0.339676	0.278248
0.293042	0.537585
0.473851	0.499262
0.25456	0.880595
0.295833	0.746606
0.202677	0.554341
0.731551	0.902153
0.219518	1.04233
0.279174	0.195184
0.566819	0.221215
0.273686	0.497854
0.425475	1.0521
0.46863	0.290575
0.342397	1.01829
0.199532	0.790673
0.584872	0.138212
0.28675	0.801564
0.288056	0.743689
0.194208	1.12433
0.233059	0.768293
0.53287	0.901525
0.487543	0.711719
0.196649	0.939993
0.24792	1.26193
0.14679	0.83615
0.325435	0.718556
0.709713	1.47129
0.0180241	0.837199
0.579501	0.680346
0.230508	1.02472
0.369401	0.448311
0.813425	0.440563
0.508981	0.803963
0.514301	0.753759
0.498857	0.475324
0.519936	0.732449
0.427264	0.864856
0.290646	0.228599
0.30645	1.30224
0.659573	0.24105
0.20575	1.11326
0.182399	0.759972
0.343025	0.585068
0.341684	1.09897
0.450981	1.18406
0.33126	1.30937
0.562755	0.692634
0.0613488	0.174729
0.265437	0.730026
0.272444	0.836913
0.34457	1.21145
0.0349352	0.74322
0.187019	0.102583
0.302137	0.501946
0.462802	0.597089
0.352027	0.551618
0.210423	1.0198
0.496223	0.231057
0.547754	0.574475
0.298259	0.443563
0.244232	0.972041
0.247731	0.923805
0.419763	0.315468
0.431741	1.23769
0.208224	0.892768
0.185522	0.902607
0.376999	0.0939741
0.738567	1.0095
0.323102	1.05481
0.356589	0.933721
0.58658	1.01037
0.468429	0.496762
0.287357	1.37788
0.381987	0.317288
0.426746	0.69388
0.406139	0.471668
0.158489	1.18834
0.651614	1.06567
0.196131	0.571279
0.286304	0.978301
0.130873	0.681831
0.169626	0.913265
0.275279	0.530805
0.491162	0.988651
0.604145	0.117679
0.289005	1.09404
0.322857	0.820633
0.190507	0.555662
0.347232	0.372005
0.986422	0.363279
0.275875	0.927973
0.451542	0.824029
0.341657	1.20995
0.330292	1.15077
0.438209	0.892851
0.639752	0.783114
0.573994	1.17872
0.526134	0.765756
0.349161	0.914605
0.205973	0.646468
0.773583	0.70718
1.06481	0.857316
0.333253	0.536011
0.34367	1.0277
0.253139	0.845936
0.180324	0.782187
0.306934	0.553698
0.116387	0.209082
0.427897	0.258896
0.260889	0.827432
0.256554	0.724063
0.270714	0.178986
0.287972	1.13712
0.865941	0.956893
0.333832	0.607311
0.926177	0.903114
0.427224	0.738966
0.126952	0.99876
0.218974	0.834549
0.489751	0.477654
1.04022	0.549686
0.272036	0.87604
0.147391	1.02995
0.235603	1.33407
0.570889	0.0345443
0.275474	0.58935
0.367276	0.527155
0.253276	0.659684
0.264234	1.28946
0.332285	0.818723
0.466292	0.919566
1.05101	0.294569
0.279094	0.915749
0.745754	0.921332
0.480754	0.783262
0.544849	0.812159
0.235241	0.254443
0.208074	1.16926
0.365562	0.380292
0.344276	1.01247
0.365788	0.618219
0.2002	0.952285
0.211804	0.737246
0.234234	0.362736
0.185605	1.07312
0.574246	0.603393
0.415408	0.110891
0.245253	0.652198
0.17704	0.974938
0.403784	0.627154
0.491307	0.507504
0.354982	1.1141
0.405742	0.664857
0.221348	0.251551
0.716402	0.678079
0.766165	0.792545
0.313906	0.843909
0.314152	0.396671
0.630339	1.19399
0.425904	1.24208
0.536674	0.908525
0.255038	0.798506
0.280197	0.714918
0.449314	0.561281
0.351292	0.945768
0.216219	0.514444
0.243663	0.842484
0.18076	0.639504
0.262898	1.05103
0.272627	0.980695
0.128157	1.03274
0.310138	1.03971
0.378804	1.10432
0.182472	1.05776
0.444357	1.11198
0.337964	1.11562
0.156561	1.20101
0.220703	1.14027
0.635674	0.829404
0.339708	0.688978
0.0938919	0.768998
0.32391	0.631276
0.323667	0.293398
0.533606	0.580394
0.85821	1.01686
0.946657	0.710642
0.471612	1.00404
0.565402	0.853843
0.393558	0.289396
0.654238	0.737991
0.259338	0.659293
0.462734	0.636891
1.12075	0.50935
0.268919	0.647774
0.781342	0.529926
0.294936	1.18135
0.423639	0.904222
0.573091	0.843238
0.346873	1.11153
0.213152	0.808861
0.380981	0.499614
0.0973789	0.956711
0.66496	0.403627
0.544184	0.548267
0.260894	0.48375
0.356078	1.11402
0.872677	0.933493
0.600955	0.279537
0.37308	0.754713
0.119861	1.29616
0.309457	0.993235
0.258622	0.55265
0.39651	0.91416
0.252907	0.720175
0.494541	1.10944
0.336516	0.364675
0.186934	1.05547
0.438693	1.04088
0.0852418	0.598872
0.442536	1.09498
0.7251	0.344346
0.306561	1.00812
0.286902	0.597294
0.123939	0.79674
0.577053	0.260335
0.592561	1.15781
0.501512	0.971126
0.481533	1.22123
0.56028	0.609486
0.36955	0.277235
0.204975	0.708716
0.452566	1.31504
0.964001	0.23457
0.921219	1.25892
0.808428	0.707704
0.361189	0.516998
0.334185	0.367166
0.29034	0.531735
0.169835	1.28446
0.306286	0.445916
0.549894	0.898941
0.276021	1.08774
0.701645	0.997934
0.573351	0.859678
0.221234	0.749712
0.317028	0.588663
1.05258	0.475784
0.143924	0.0617445
0.389709	0.908977
0.0489639	0.586419
0.362194	0.80254
0.0914362	0.992859
0.210535	0.394038
0.094339	0.907439
0.413725	0.755023
0.295947	0.430676
0.430922	0.588045
0.266937	0.970564
0.490578	1.05935
0.368176	0.801003
0.910351	1.00878
0.323681	0.656432
0.446401	0.707948
0.76621	0.743947
0.307394	0.915193
	0.966212
0.573272	0.538987
0.248265	1.02113
0.26075	0.27752
0.15433	0.969866
0.416656	0.04275
0.196318	0.574888
0.406076	0.73748
0.478867	0.981217
0.352101	0.737819
0.28951	0.744922
0.449359	0.963274
0.428247	0.612842
0.558617	0.176476
0.450626	0.791561
0.28707	1.04055
0.411512	0.883167
0.164058	0.958598
0.386618	0.493264
0.540587	0.976405
0.1463	0.063977
0.158019	0.995644
0.632173	0.321948
0.819929	0.818971
0.553544	0.542693
0.45445	0.510149
0.609449	0.833533
0.44413	0.895968
0.37333	0.488211
0.274094	0.788942
0.634403	1.27187
0.473669	0.781131
0.056004	0.795069
0.843376	1.09999
0.446973	0.608158
0.977036	0.787197
0.417468	1.0387
0.237079	0.306143
0.813079	0.831248
0.89553	1.2997
0.361829	0.285759
0.239722	1.02786
0.849623	1.28964
0.656889	0.28913
0.515375	0.641162
0.153908	0.888141
0.324931	0.877099
0.229821	0.527799
0.823539	0.23591
0.380817	0.935318
0.399672	0.911989
0.349572	1.08458
0.261811	0.724649
0.305914	0.812688
0.551316	0.707816
0.253637	0.393881
0.494157	0.623592
0.149231	0.926114
0.506985	0.0145762
0.634843	0.796444
0.278519	0.986833
0.333774	0.973694
0.365033	0.0242523
0.674509	1.03534
0.625379	0.601802
0.33046	0.501747
0.828281	0.344626
0.736941	0.619476
0.449779	0.567048
0.455011	1.08902
0.460589	0.909889
0.410302	1.13563
0.0355613	0.679974
0.243009	0.1327
0.427776	0.718519
0.387095	0.142152
0.818726	1.17366
0.212344	1.20295
0.232512	0.774205
0.192023	1.40179
0.13423	0.448247
0.0749094	0.746513
0.935138	1.11697
0.17138	0.957788
0.352899	0.687742
0.963088	0.667388
0.328355	0.965524
0.2137	1.08783
0.746466	0.213675
0.596425	1.18591
0.5419	0.370176
0.300287	0.656172
0.878333	0.874793
0.865766	1.04104
0.0498956	0.352138
0.221805	0.71924
0.945348	0.497078
0.268438	0.883598
0.79856	0.29882
0.699893	0.222078
0.278802	0.790504
0.190591	0.569872
0.809938	0.513369
0.238901	0.519286
0.576588	0.893678
0.350813	0.712298
0.328341	0.746027
0.691588	0.123196
0.284414	0.457077
0.235111	0.918632
0.448985	1.34045
0.19974	1.17745
0.760838	0.966166
0.295127	0.537156
0.138503	0.557258
0.247537	0.674021
0.165707	1.13077
0.387621	0.943326
0.038079	0.826982
0.35625	0.955335
0.349753	0.984099
0.550179	1.23716
0.200132	0.978969
0.0800845	0.65288
0.370779	0.448965
0.352586	0.942852
1.018	0.986041
0.35372	0.780687
0.782674	0.733156
0.391967	1.02593
0.439621	0.616648
0.257445	0.538201
0.194161	0.972097
0.203704	0.872026
0.464112	0.496083
0.319051	0.494396
0.692615	0.800891
0.828134	0.592352
0.385548	0.436417
0.253277	0.801093
0.518624	1.03274
0.484517	0.403041
0.311896	0.763265
0.736455	0.876812
0.720878	0.825455
0.320292	0.535031
0.343827	0.879739
0.360497	0.988755
0.676758	0.975749
0.148962	0.409982
0.433379	0.720416
0.488989	0.845513
0.910148	1.11864
0.141616	0.469224
0.619268	0.384043
0.208533	0.488646
0.384739	0.302638
0.437334	0.27782
0.404366	0.643397
0.671464	1.05959
0.300489	0.695337
0.227099	0.898101
0.343223	1.12213
1.0154	0.44134
0.508734	0.636242
0.520122	0.355639
0.44978	0.389852
0.251082	0.891121
0.276489	0.614557
0.498459	0.774889
0.743612	0.47559
0.153484	0.820585
0.500192	0.536474
0.476537	0.741762
0.604037	0.500326
0.424065	0.206545
0.442453	1.11003
0.556881	1.25064
0.275407	0.562264
0.87765	0.83811
0.314023	0.915324
0.242028	0.604658
0.182012	0.783912
0.356428	0.789455
0.788135	1.24161
0.259286	1.12066
0.922598	0.417201
0.315891	0.565599
0.42756	0.378369
0.322948	0.291056
0.281739	0.730258
0.699223	1.08307
0.316926	1.01216
0.102817	1.24305
0.458631	0.885012
0.426268	0.511147
0.406881	0.292962
0.398953	1.1487
0.261331	1.09842
0.330226	0.670477
0.695802	0.659715
0.461053	0.660237
0.685125	0.250631
0.332265	0.39341
0.456175	0.287015
0.589239	0.107312
0.271787	0.526338
0.280757	0.619077
0.286917	0.665133
0.13401	0.964571
0.144128	0.904017
0.75925	0.32143
0.242619	0.70769
0.146583	0.98115
0.969031	0.815977
0.364808	0.712176
0.181869	0.206448
0.492493	1.23316
0.676394	0.433285
0.328526	0.0621426
0.331086	0.0351696
0.934363	0.697936
0.306908	0.51031
0.507065	0.385737
0.360537	0.935408
0.127079	0.731812
0.277143	0.753311
0.332883	0.971892
0.587907	0.979629
0.442887	0.870797
0.115068	0.48254
0.265789	0.731642
0.191277	0.0342913
0.333346	0.523089
0.65397	0.521207
0.37655	0.0909948
0.324237	0.291721
0.583607	1.20224
0.334542	0.760709
0.502043	0.603946
0.122828	0.864382
0.437508	0.438916
0.28885	1.03364
0.508052	0.960749
0.039538	0.968748
0.626044	0.084682
0.252132	0.440193
0.630889	0.939167
0.56604	0.977992
0.431762	1.17455
0.371379	0.926414
0.371683	0.765888
0.317357	0.343582
0.231562	1.00502
0.400326	0.102022
0.818092	0.816678
0.41132	0.997584
0.246772	0.243116
0.382407	1.28497
0.430326	1.17276
0.236673	0.883047
0.346097	0.422799
0.345354	0.648027
0.521583	1.22331
0.385064	1.01697
0.366357	0.724009
0.381664	0.934628
0.352352	0.884584
0.447589	1.2553
0.338437	0.883942
0.264296	0.401623
0.131942	0.89204
0.229536	0.99816
0.975241	0.838021
0.29835	0.699425
0.251409	0.70484
0.379202	0.452767
0.235043	0.502385
0.131527	1.42428
0.953264	0.0125269
0.102171	0.824166
0.486258	0.45325
0.308208	0.709729
0.336196	0.921321
0.263628	0.991509
0.2384	0.93416
0.482081	0.727567
0.159219	0.70931
0.333687	0.753036
0.40901	1.10278
0.239197	1.06483
0.252852	0.549283
0.674163	1.10149
0.214979	0.487243
0.169693	0.758281
0.141061	1.01031
0.47407	1.20745
0.511512	1.02177
0.27874	0.619727
0.408496	0.513608
0.697719	1.19831
0.543072	0.541906
0.42879	1.1061
0.618338	0.964623
0.653976	0.363157
0.366136	0.24417
0.337558	0.192633
0.277305	0.901144
0.291307	0.560607
0.210543	0.998214
0.117196	0.408415
0.297005	0.451033
0.293327	1.08241
0.685638	0.784758
0.937593	0.248741
0.168055	0.408592
0.355607	0.430157
0.208013	0.935818
0.256454	0.883363
0.136938	1.02211
1.01779	0.591795
0.309852	0.427756
0.204968	0.360982
0.581692	0.279261
0.344288	0.763952
0.449677	1.03129
0.749043	0.928113
0.58706	0.566897
0.481006	1.13722
0.299614	1.05085
0.0821765	1.17396
0.321739	1.34913
0.553069	1.03947
0.508823	1.03131
0.367867	0.488247
0.468089	1.08491
0.832321	0.151975
0.425245	0.81203
0.87964	1.05123
0.269256	0.549386
0.346495	1.11108
0.185221	0.916496
0.12688	0.576841
0.333527	1.02114
0.363742	0.66239
0.380948	0.569929
0.297975	1.10153
0.412879	0.336903
0.449176	0.905298
0.428745	0.729201
0.17776	0.671232
0.571455	0.883048
0.536068	0.872092
0.294805	0.593793
0.453979	0.738192
0.656426	0.576751
0.715076	0.903038
0.300968	0.617505
0.277781	0.815233
0.289681	0.577952
0.345821	0.717187
0.575309	0.192708
0.320722	1.25426
0.348081	0.925963
0.318615	0.851932
0.250032	0.984284
0.330772	0.748922
0.326904	0.878529
0.431097	0.723503
0.247513	0.855381
0.176636	0.765812
0.204192	0.537245
0.490708	1.20044
0.283241	0.941149
0.634161	0.748377
0.544451	0.596564
0.658342	0.314075
0.214147	1.10569
0.157677	0.832603
1.09465	0.624268
0.345825	0.606639
0.362604	0.72484
0.486102	0.677445
0.292196	0.464416
0.375987	0.198803
0.341349	0.500426
0.308985	0.61359
0.14613	0.559389
0.364382	0.595851
0.221538	0.425024
0.349384	0.639195
0.325485	1.11195
0.325953	0.276417
0.16727	0.0936997
0.34068	0.389826
0.156029	0.888519
0.934502	0.811461
0.379414	1.00022
0.292505	0.270387
0.600415	0.508868
0.422221	0.753171
0.50854	0.834418
1.04813	1.21058
0.230626	0.797707
0.277353	0.684056
0.419491	1.08303
0.362668	0.97955
0.683777	0.150475
0.526175	1.07345
0.367882	0.976196
0.679447	0.640258
0.244515	0.484237
0.434585	0.913117
0.463435	0.891986
0.189839	0.764815
0.275804	0.787249
0.576569	0.545438
0.282214	0.869953
0.240356	1.35638
0.297112	1.1083
0.650424	0.73951
0.436836	0.515959
0.35941	0.163988
0.458214	0.899191
0.860363	0.153732
0.42341	0.773047
0.103101	1.22497
0.252478	0.867737
0.355241	1.17496
0.407742	0.319038
0.0790759	0.261561
0.249796	1.0334
0.286293	0.495112
0.442386	0.835535
0.13579	0.550455
0.0646581	0.902018
0.582104	0.756246
1.10215	0.797986
0.484347	0.976641
0.295185	1.1679
0.341403	0.63986
0.489922	0.538792
0.192009	0.736268
0.294027	1.05287
1.08432	1.4194
0.632382	0.718933
0.237428	0.547287
0.721987	0.710764
0.915604	0.665605
0.395999	0.534791
0.253902	1.01693
0.203246	0.44662
0.563184	1.02223
0.0267736	1.04762
1.07294	1.28553
0.308911	0.521978
0.246383	0.731742
0.347168	0.308939
0.314015	0.214263
0.274352	0.927951
0.202725	1.05959
0.349932	0.806279
0.461314	1.10003
0.452694	1.04981
0.551452	0.288214
0.226537	0.258091
0.492217	0.422176
0.408126	0.862032
0.348251	0.747129
0.6126	0.794685
0.35046	1.19903
0.377824	1.31301
0.19783	1.10725
0.626048	0.964265
0.327899	0.895189
0.671757	0.315353
0.321615	0.861895
0.441409	0.818108
0.705013	0.560483
1.0023	0.842628
0.105247	0.307889
0.554503	0.677617
0.259687	1.16236
0.721195	0.721024
0.11574	1.05453
0.113503	0.472168
0.274539	0.407927
0.480321	0.967586
0.416445	0.666816
0.503429	0.439857
0.129141	1.3566
0.548097	0.541823
0.170324	0.248314
0.634198	0.241668
0.604548	0.700401
0.294538	0.310399
0.0459976	0.141843
0.128056	0.686318
0.893752	0.401127
0.39819	1.09925
0.298437	0.383349
1.01724	0.344837
0.354101	0.450862
0.19987	0.423163
0.317045	1.07161
0.186544	0.584251
0.298376	0.765866
0.400551	0.530784
0.397208	0.6573
0.138895	0.716141
0.228323	0.626784
0.226879	0.611316
0.357847	1.27867
0.131075	0.927852
0.24311	0.743326
0.225535	1.03784
0.54263	0.609093
0.201533	0.69212
0.136065	0.835297
0.723317	0.877349
0.154328	0.558268
0.460505	0.63057
0.762298	1.06607
0.300512	1.07062
0.530694	0.766997
0.428695	1.09285
0.505234	1.05406
0.29851	0.940115
0.317193	0.195545
0.338239	0.887294
0.666299	0.214868
0.3685	0.634341
0.997498	0.893558
0.778208	0.815993
0.123563	1.08041
0.831295	1.16104
0.704414	1.19049
0.355876	0.894152
0.170856	1.29761
0.182589	0.736074
0.744908	0.678508
0.410189	1.33367
0.17621	0.100615
0.832433	1.2588
0.473532	1.10868
0.29807	1.02676
0.277247	1.13214
0.271679	0.963301
0.44251	0.261167
0.409748	0.885279
0.41022	0.233092
0.437277	0.433014
0.45868	0.393802
0.12948	0.380866
0.0713663	0.866492
0.992628	1.0282
0.243329	1.06754
0.260009	0.333739
0.0734034	1.14793
0.49183	0.739659
0.373173	0.706876
0.789182	0.218368
0.415125	1.27984
0.337339	0.582344
0.258748	1.11586
0.924161	0.04052
0.77904	0.803072
0.316992	0.726096
0.280889	0.154259
0.238458	0.53391
0.833369	1.12123
0.219408	0.510956
0.379063	0.58656
0.27786	0.972221
0.486368	1.2475
0.348961	1.39754
0.172214	1.18787
0.49029	0.848545
0.448652	0.558513
0.511539	0.927869
0.39363	0.91853
0.37626	0.365023
0.303536	0.202414
0.327286	0.680426
0.392926	1.07204
0.454755	1.08713
0.518683	0.530421
0.784936	1.20925
0.240512	0.483759
0.291991	1.12582
0.39369	1.17325
0.150036	1.34721
0.573488	1.24972
0.424265	0.226088
0.926069	1.10303
0.329692	0.660857
0.0631783	0.988142
0.407437	0.665759
0.18071	0.957329
0.199501	0.784224
0.379775	0.80707
0.365696	1.28109
0.372706	1.39636
0.395127	0.264232
0.298229	0.396018
0.50469	0.835842
0.315117	0.413945
0.254469	0.840639
0.549361	0.40201
0.286012	1.13253
0.295957	0.46256
0.693523	0.688002
0.23129	1.29589
0.348996	0.148229
0.683769	1.21067
0.185443	0.621691
0.419968	1.00204
0.548571	0.188909
0.361019	0.86346
0.170073	0.686187
0.382458	1.31943
0.485424	0.378764
0.227945	0.795135
0.45153	0.678396
0.232562	0.617242
0.582152	0.900679
0.326058	1.169
0.303983	0.846389
0.238402	0.458156
0.273064	0.823991
0.271505	0.492016
0.38638	0.771106
0.27976	0.996308
0.388132	0.623755
0.364171	0.3815
0.337685	1.38427
0.713538	0.765006
0.63396	0.407501
0.394326	0.394712
0.38793	0.443356
0.208184	0.795024
0.438732	1.09014
0.0791259	1.12046
0.275641	0.936222
0.226248	0.378092
0.361933	0.832095
0.337063	0.716824
0.204806	0.323127
0.0430029	0.812292
0.247677	0.81716
0.55345	1.20362
0.209838	0.585285
0.43816	0.425995
0.26151	1.01316
0.29506	0.907668
0.273157	0.563427
0.670119	0.797103
0.199219	0.719686
0.549256	0.678557
0.400592	0.787782
0.15844	0.798161
0.491723	1.25835
0.509114	0.915757
0.418652	0.641594
0.4854	0.715589
1.01393	0.780854
0.24866	0.106646
0.242843	0.699282
0.213433	0.9844
0.305928	0.822175
0.388218	1.10287
0.566111	0.610865
0.393934	0.95789
0.640518	0.816911
0.414935	0.350297
0.447166	1.2045
0.684165	0.545602
0.311539	0.736045
0.901526	0.874192
0.110828	0.880046
0.616469	0.379666
0.506129	0.849142
0.310565	1.02149
0.43094	0.804898
0.622699	1.1099
0.464505	1.04789
0.413739	0.352281
0.493045	1.17548
0.359922	1.01131
0.344427	0.684078
0.0407105	1.31259
0.353107	0.504216
0.293633	0.675754
1.07627	0.373551
0.195749	0.908738
0.358653	1.11285
1.38125	0.63814
0.206723	0.376882
0.752962	1.42118
0.465287	0.128127
0.307768	1.07489
1.17922	1.11732
0.550008	0.350495
0.492767	1.11416
0.648773	0.812814
0.276815	0.145093
0.479998	0.513371
0.465044	1.17854
0.583169	1.02358
0.45762	0.63885
1.03237	0.784701
0.135488	0.343515
0.969356	0.463787
0.620112	0.895945
0.277488	0.967989
0.919563	0.66372
0.329728	0.168324
0.322367	0.877068
0.294587	0.611555
0.133007	0.189301
0.293167	0.560303
0.479414	0.470187
0.440923	0.642812
0.716532	1.24451
0.263689	0.483203
0.556383	1.1956
0.253979	1.15673
0.444075	0.395988
0.313957	0.630376
0.404011	0.377055
0.48869	0.939806
0.441455	1.07367
0.331591	0.816715
0.134441	0.720521
0.329451	0.998047
0.283377	0.391463
0.29404	1.12177
0.474694	0.227659
1.01394	0.492624
0.319082	0.580161
0.71198	0.312963
0.27859	0.394771
0.23861	0.335976
0.202408	1.00106
0.362977	0.855965
0.532081	0.362207
0.183465	0.714556
0.179257	1.2056
0.273553	0.825391
0.458867	0.77068
0.32957	1.32582
0.725315	0.751066
0.413469	0.458232
0.415794	1.07866
0.78357	0.126081
0.297188	0.711675
0.233813	0.181655
0.227822	0.35993
0.3722	0.733346
0.430879	0.287697
0.3378	1.0461
0.275535	0.881081
0.267472	0.998759
0.378019	0.540918
0.177826	0.37411
0.308878	0.800407
0.386032	0.852975
0.956873	1.12757
0.869143	0.761743
1.03907	1.16653
0.223688	0.654233
0.278623	1.10403
0.305327	1.07431
0.508524	1.02517
0.225892	0.263047
0.191589	0.689961
0.70929	1.01006
0.630364	0.377314
0.377236	0.802003
0.175326	0.42332
0.276866	0.754206
0.0891333	0.462452
0.341188	0.992356
0.397633	0.894232
0.436962	0.744563
0.287099	1.01186
0.418135	0.985848
0.975236	0.725179
0.241552	0.420144
0.242013	1.06851
0.653951	1.15087
0.181736	0.594419
0.309631	0.129397
0.250282	0.360887
0.308277	0.761453
0.256039	0.819503
0.554592	1.03329
0.425102	1.32431
0.141646	0.597856
0.502255	0.725705
0.331961	0.110005
0.493159	0.414328
0.600779	0.947773
0.376154	0.969662
0.21694	1.25008
0.204666	0.223557
0.369755	1.1847
0.51631	0.371122
0.290677	1.04269
0.067813	0.789347
0.181415	0.769221
0.172107	0.319037
0.219302	0.937311
0.243584	0.51422
0.0888774	1.18351
0.320411	1.05522
0.52668	0.628034
0.246124	1.11716
0.146596	0.55805
0.490431	0.888304
0.389694	0.955137
0.0478311	0.996946
0.198734	0.452495
0.756817	0.169582
0.220206	0.921372
0.675816	1.08384
0.0728163	1.08339
0.455511	0.891783
0.168881	1.03288
0.177457	0.667659
0.312207	0.795552
0.145526	0.730899
0.2371	0.717432
0.419659	0.952441
0.304771	0.710034
0.332453	1.05436
0.219484	1.2693
0.46755	0.192418
0.337935	0.845339
0.19769	0.312032
0.341466	0.946933
0.315298	0.884627
0.157708	0.964341
0.613567	0.265304
0.27428	1.02292
0.205492	0.400371
0.67685	1.05222
0.253832	1.06873
0.102846	0.135197
0.416782	0.901798
0.663337	0.239857
0.277171	1.29463
0.467979	0.526953
0.457091	1.2467
0.0856435	0.474939
0.240384	0.974349
0.471943	0.8477
0.311699	0.23942
0.61005	0.490911
0.397612	1.13237
1.04741	0.708857
0.552833	0.617873
0.167948	0.397069
0.208055	0.441696
0.415256	1.07677
0.290737	0.367541
0.439398	0.195319
0.351895	0.423633
0.385331	1.07601
0.256726	0.420749
0.935845	0.670735
0.230678	0.716698
0.712449	1.02815
0.528331	0.737514
0.435805	0.642911
0.421563	0.821915
0.208709	1.27647
0.407089	0.871598
0.799408	1.16741
0.381943	0.953951
0.198219	0.917805
0.187864	1.15001
0.177734	1.3559
0.205959	0.271354
0.04777	0.780394
0.101641	0.668197
0.134768	0.984416
0.50923	0.526176
1.30979	0.610871
0.582373	0.653655
0.203065	0.804659
0.291009	0.548355
0.36689	0.20633
[truncated: 1,520 more rows]
