# Supplementary material for: Global chromatin mobility induced by a DSB is dictated by chromosomal conformation and defines the HR outcome
Source: eLife journal article supplement (doi:10.7554/elife.78015), 2022-09-09
Supplement: fig2-figsupp1-data2 [file F2S1SD2.xlsx]

## Sheet: Feuil1
MSD at 10s (median)
	- DSB	+ DSB	+DSB/-DSB
3	0.0654	0.0688	1.05199
4	0.0547	0.0628	1.14808
5	0.0529	0.0698	1.31947
6	0.0523	0.0868	1.65966
12	0.0494	0.101	2.04453
