# Supplementary material for: Global chromatin mobility induced by a DSB is dictated by chromosomal conformation and defines the HR outcome
Source: eLife journal article supplement (doi:10.7554/elife.78015), 2022-09-09
Supplement: fig3-data2 [file elife-78015-fig3-data2-v1.zip]

## Sheet: Feuil1
MSD at 10s (median) @10s . Fig provided as source data
	MSD at 10s
-DSB	0.0494
+DSB + dCen (white cells)	0.0822
+DSB + dCen (red cells)	0.0641
