# Supplementary material for: Global chromatin mobility induced by a DSB is dictated by chromosomal conformation and defines the HR outcome
Source: eLife journal article supplement (doi:10.7554/elife.78015), 2022-09-09
Supplement: fig3-data4 [file elife-78015-fig3-data4-v1.zip]

## Sheet: Feuil1
1st TIME
	0h	2h	4h	6h	8h	10h	12h	24h
WT C	2.22	2.46	4.22	6.15	6.68	6.73	9.21	37.5
Δrad9 C	1.39	1.22	1.66	3.16	3.53	4.44	5.4	11.5
Δrad9 S	1.49	1.41	1.33	1.94	1.66	1.68	1.88	3.29
2nd TIME
Temps d'induction	0	2	4	6	8	10	12	24
Souche C WT + dCen	2.34							45.9
Souche C Δrad9 + dCen	1.9	2.01	1.82	3.72	3.92	5.13	7.45	20.5
Souche S Δrad9 + dCen	1.57	1.82	1.46	1.92	2.64	2.27	1.83	3.19
CONCATENATION
	0h	2h	4h	6h	8h	10h	12h	24h
WT C	2.28	2.46	4.22	6.15	6.68	6.73	9.21	37.5
Δrad9 C	1.645	1.615	1.74	3.44	3.725	4.785	6.425	16
Δrad9 S	1.53	1.615	1.395	1.93	2.15	1.975	1.855	3.24
DESVEST	0h	2h	4h	6h	8h	10h	12h	24h
WT C	0.0424264							5.9397
Δrad9 C	0.180312	0.279307	0.0565685	0.19799	0.137886	0.243952	0.724784	3.18198
Δrad9 S	0.0282843	0.144957	0.0459619	0.00707107	0.346482	0.208597	0.0176777	0.0353553
WT	1.614	2.45266	1.76868	4.30405	7.79048	6.27735	6.52853
RAPPORT AU DONNEES D'EA
	0h	4h	6h	8h	10h	12h	24h
WT	5.24735	7.24006	10.633	24.5784	37.7613	51.7601	86.8613
Δrad9 C	3.78592	2.98524	5.94754	13.7058	26.8481	36.1084	37.0608
Δrad9 S	0.964142	0.932981	1.86354	2.13324	2.6693	3.73384	10.2677
