# Supplementary material for: Global chromatin mobility induced by a DSB is dictated by chromosomal conformation and defines the HR outcome
Source: eLife journal article supplement (doi:10.7554/elife.78015), 2022-09-09

# Fig. S3B

36h

**C**

**Control**

**Damage**

WT PRS  
WT Pb  
WT Cen  
*Δrad9* PRS  
*Δrad9* Pb  
*Δrad9* Cen

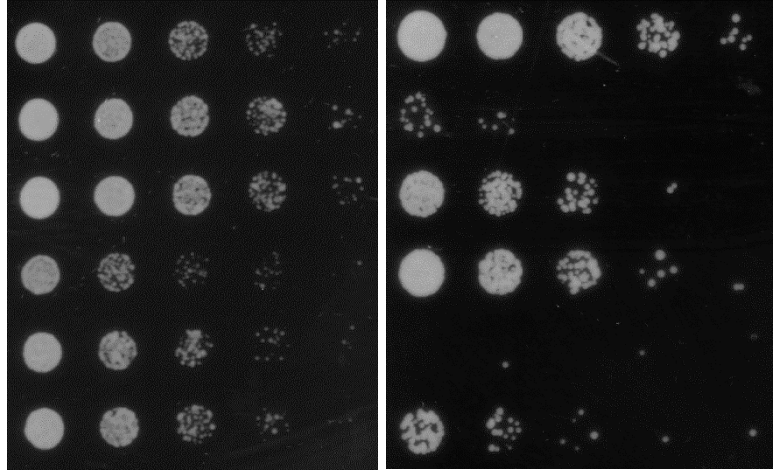

48h

**S**

**Control**

**Damage**

WT PRS  
WT Pb  
WT Cen  
*Δrad9* PRS  
*Δrad9* Pb  
*Δrad9* Cen

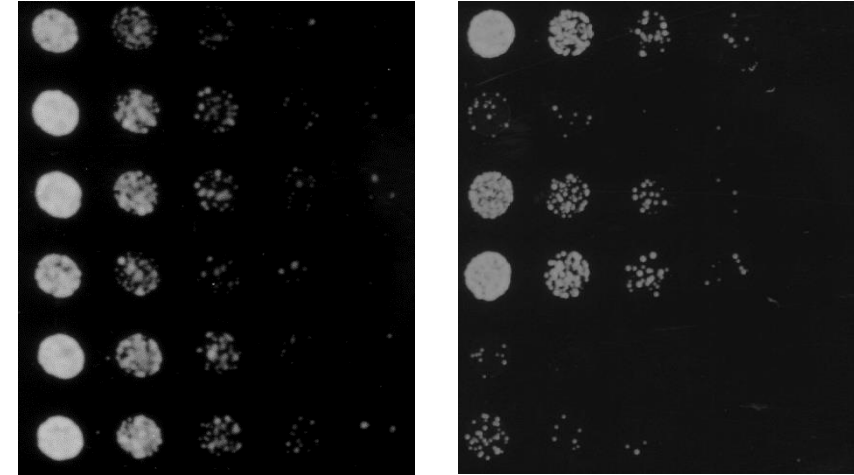

Supplement: fig3-figsupp1-data1 [file elife-78015-fig3-figsupp1-data1-v1.pdf]
