# Supplementary material for: Global chromatin mobility induced by a DSB is dictated by chromosomal conformation and defines the HR outcome
Source: eLife journal article supplement (doi:10.7554/elife.78015), 2022-09-09
Supplement: fig4-data1 [file 68beab3c-915d-4997-b04b-843649bb5dd1.xlsx]

## Sheet: Feuil1
concatenation_in trans_C
20191218_Trans
20200205_Trans
20200124_Trans
	moyenne				SD
	15 kb	50 kb	100 kb	act1	15 kb	50 kb	100 kb
no DSB	0.0107585	0.010605	0.0106507	0.0106681	0.0402402	0.0379568	0.039776	0.146932
DSB	0.0639869	0.0169571	0.0269608	0.0100392	0.221821	0.170979	0.144924	0.195703
DSB + donor	0.127296	0.0731707	0.108785	0.0352206
	moyenne
	15	50	100	act1
- DSB	1.00847	0.994089	0.998369	1
+ DSB	6.3737	1.68909	2.68555	1
+ DSB + d Cen	3.61426	2.0775	3.08868	1
