# Supplementary material for: Global chromatin mobility induced by a DSB is dictated by chromosomal conformation and defines the HR outcome
Source: eLife journal article supplement (doi:10.7554/elife.78015), 2022-09-09
Supplement: fig4-data1 [file 06371b2f-0d6d-4cf5-9853-1722c3dc5c6f.xlsx]

## Sheet: Feuil1
concatenation_in cis_C
20200205 incis C	5 KB	50 KB	100 KB
- DSB	0	0	0
+ DSB	1.40667	17.0105	12.3816
+ DSB +dCen	1.78604	6.54261	2.36894
20200117 in cis C	5 KB	50 KB	100 KB
- DSB	0.063709	0.0896733	0.0620252
+ DSB	0.994522	16.3175	12.3945											ƴ
+ DSB +dCen	0.6013	12.6135	2.23312
20200109 IN CIS	5	50	100
- DSB	0.0524783	1.33701	2.44202e-05
+ DSB	0.109614	10.9469	13.9433
+ DSB +dCen	0	15	2.74612
moyenne
	5	50	100
- DSB	0.0580936	0.71334	0.0310248	0.00794136	0.881998	0.0438412
+ DSB	0.836935	16.664	12.9065	0.662732	3.31893	0.897921
+ DSB +dCen	0.795779	11.3854	2.44939	0.837736	4.36039	0.265795
