# Supplementary material for: Global chromatin mobility induced by a DSB is dictated by chromosomal conformation and defines the HR outcome
Source: eLife journal article supplement (doi:10.7554/elife.78015), 2022-09-09

# Fig. S4B

36h

**C**

Control

Damage

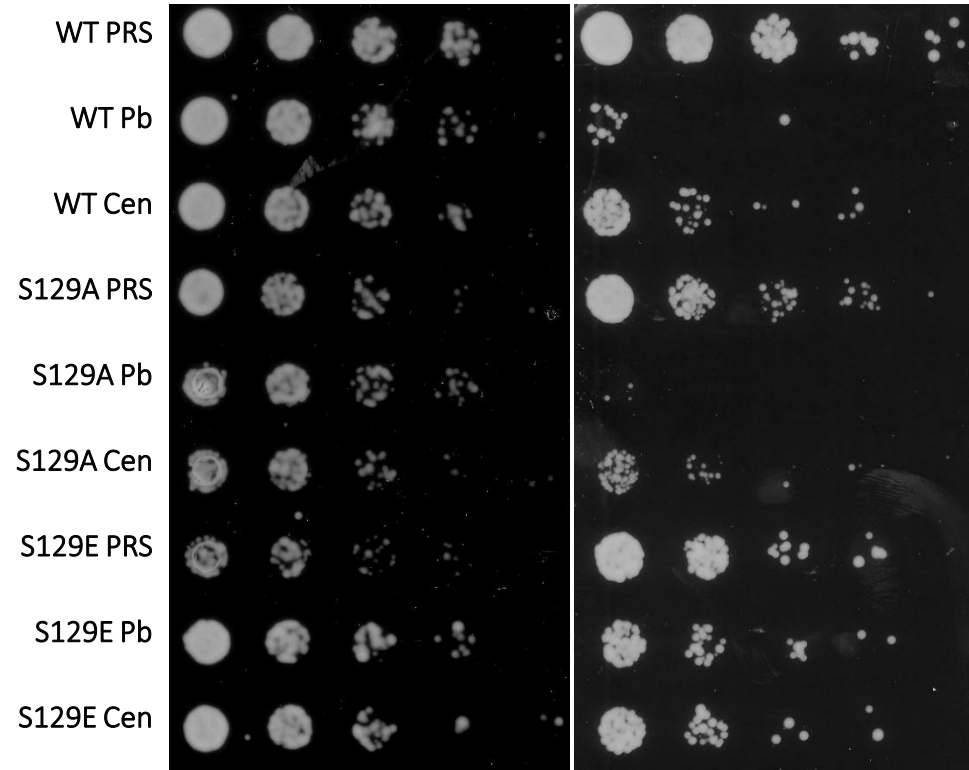

36h

**S**

Control

Damage

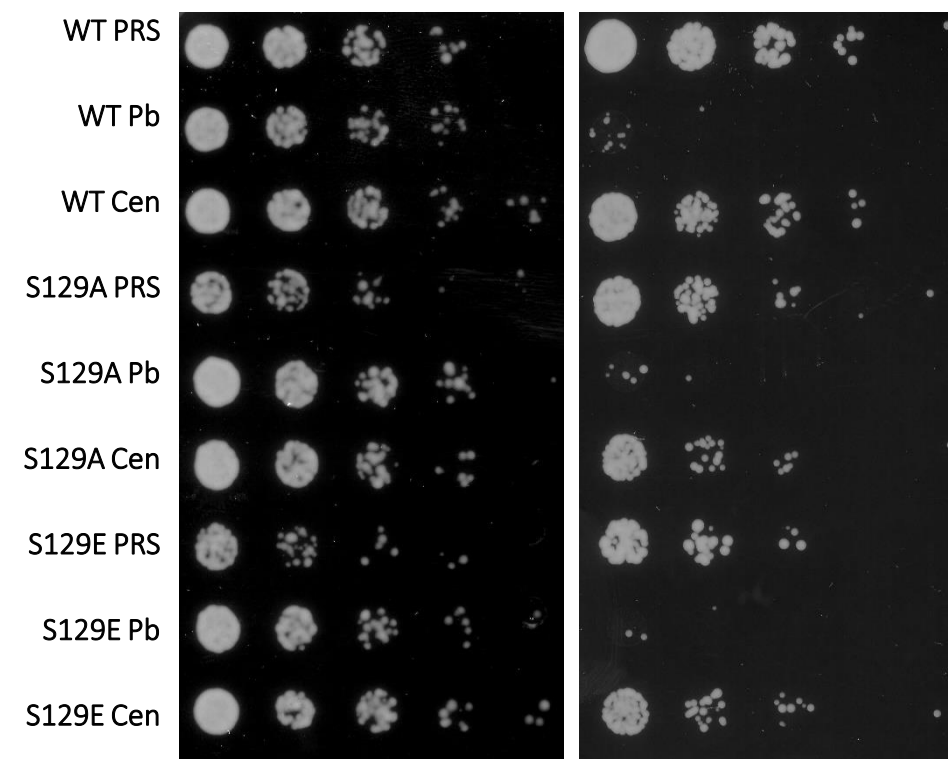

Supplement: fig4-figsupp1-data1 [file elife-78015-fig4-figsupp1-data1-v1.pdf]
