# Supplementary material for: Global chromatin mobility induced by a DSB is dictated by chromosomal conformation and defines the HR outcome
Source: eLife journal article supplement (doi:10.7554/elife.78015), 2022-09-09
Supplement: fig5-data1 [file F5SD1.xlsx]

## Sheet: Feuil1
1st TIME
Rad51 S
STANDARD CURVE ACTIN							STANDARD CURVE I-Scel
Sample	Cp	Concentration	Average	St, Dv,			Sample	Cp	Concentration	Average	St, Dv,		Sample	Average	St dv	Average	St dv		Sample	Actin	I-Scel
0.25	17.81	2.48E-1	17.7467	0.145717			0.25	18.46	0.177	18.6267	0.238607		0.25	17.75	0.1457	18.627	0.239		0.25	17.75	18.627
0.25	17.58	2.89E-1					0.25	18.52	0.26				0.0625	19.88	0.0451	20.47	0.139		0.0625	19.88	20.47
0.25	17.85	2.42E-1					0.25	18.9	0.294				0.015625	22.03	0.096	22.543	0.087		0.015625	22.03	22.543
0.0625	19.88	6.32E-2	19.8767	0.0450925			0.0625	20.31	0.0626	20.47	0.138564		0.00390625	24.11	0.1253	24.607	0.035		0.00390625	24.11	24.607
0.0625	19.92	6.17E-2					0.0625	20.55	0.0554
0.0625	19.83	6.52E-2					0.0625	20.55	0.0572
0.015625	21.99	1.56E-2	22.03	0.0964365			0.015625	22.52	0.0164	22.5433	0.0873689
0.015625	21.96	1.60E-2					0.015625	22.64	0.015
0.015625	22.14	1.42E-2					0.015625	22.47	0.0172
0.00390625	23.99	4.16E-3	24.11	0.1253			0.00390625	24.64	0.00391	24.6067	0.0351188
0.00390625	24.24	3.54E-3					0.00390625	24.57	0.00378
0.00390625	24.1	3.89E-3					0.00390625	24.61	0.00462
ACTIN							I-Scel
Rad51-1st
Sample	Concentration	S,dv,	Average Ct	St.dv. (<0.5)	POWER		Sample	Concentration	S,dv,	Average Ct	St.dv. (<0.5)	POWER	Scel/Actin	/t oh	1-mean	%
Δrad51 S 0h	19.13	0.104	19.0633	0.0832666	6.42266e+07		Δrad51 S 0h	18.73	0.215	18.7833	0.128582	7.79836e+07	1.21419
Δrad51 S 0h	19.09	0.107					Δrad51 S 0h	18.69	0.222
Δrad51 S 0h	18.97	0.115					Δrad51 S 0h	18.93	0.187
Δrad51 S 1h	18.21	0.191	18.2967	0.16773	1.09271e+08		Δrad51 S 1h	18.6	0.236	18.58	0.02	8.97868e+07	0.82169	0.676737	0.323263	32.3263
Δrad51 S 1h	18.19	0.193					Δrad51 S 1h	18.56	0.242
Δrad51 S 1h	18.49	0.159					Δrad51 S 1h	18.58	0.239
Δrad51 S 3h	18.46	0.161	18.29	0.19975	1.09777e+08		Δrad51 S 3h	19.59	0.12	19.4933	0.0873689	4.76729e+07	0.434271	0.357661	0.642339	64.2339
Δrad51 S 3h	18.07	0.209					Δrad51 S 3h	19.42	0.134
Δrad51 S 3h	18.34	0.28					Δrad51 S 3h	19.47	0.0827
Δrad51 S 6h	18.78	0.208	18.8967	0.106927	7.20919e+07		Δrad51 S 6h	20.63	0.0386	20.7233	0.090185	2.03238e+07	0.281915	0.232183	0.767817	76.7817
Δrad51 S 6h	18.92	0.19					Δrad51 S 6h	20.81	0.0341
Δrad51 S 6h	18.99	0.18					Δrad51 S 6h	20.73	0.0361
Rad51 C
STANDARD CURVE ACTIN							STANDARD CURVE I-Scel
Sample	Concentration	S,dv,	Average	St, Dv,			Sample	Concentration	S,dv,	Average	St, Dv,
0.25	18.23	0.239	18.2133	0.0763763			0.25	18.27	0.177	17.9167	0.3139
0.25	18.28	0.232					0.25	17.81	0.26
0.25	18.13	0.258					0.25	17.67	0.294
0.0625	20.6	0.0425	20.12	0.42332			0.0625	19.5	0.0626	19.58	0.072111
0.0625	19.96	0.0678					0.0625	19.64	0.0554
0.0625	19.8	7,62E-2					0.0625	19.6	0.0572
0.015625	22.19	0.0133	22.0367	0.145717			0.015625	21.08	0.0164	21.1	0.0818535
0.015625	22.02	0.0151					0.015625	21.19	0.015
0.015625	21.9	0.0164					0.015625	21.03	0.0172
0.00390625	24.61	0.00227	24.1367	0.470035			0.00390625	23.17	0.00391	23.0933	0.196554
0.00390625	23.67	0.00449					0.00390625	23.24	0.00378
0.00390625	24.13	0.00323					0.00390625	22.87	0.00462
ACTIN							I-Scel
Sample	Concentration	S,dv,	Average Ct	St.dv. (<0.5)	POWER		Sample	Concentration	S,dv,	Average Ct	St.dv. (<0.5)	POWER	Scel/Actin	/t oh	1-mean	%
Rad51 C 0h	20.06	0.0628	19.785	0.388909	3.89468e+07		Rad51 C 0h	19.44	0.0658	19.245	0.275772	5.66275e+07	1.45397
Rad51 C 0h	19.51	0.0937					Rad51 C 0h	19.05	0.0917
Rad51 C 1h	19.07	0.13	19.205	0.190919	5.82195e+07		Rad51 C 1h	18.99	0.0966	18.99	11.0874	6.75756e+07	1.1607	0.798298	0.201702	20.1702
Rad51 C 1h	19.34	0.107					Rad51 C 1h	34.67	0.203
Rad51 C 3h	18.03	0.278	18.16	0.183848	1.20128e+08		Rad51 C 3h	19.01	0.0947	19.05	0.0565685	6.48229e+07	0.539614	0.371131	0.628869	62.8869
Rad51 C 3h	18.29	0.229					Rad51 C 3h	19.09	0.0887
Rad51 C 6h	23.29	0.00593	22.09	0.848528	7.88129e+06		Rad51 C 6h	21.91	0.0086	23.66	1.23744	2.65448e+06	0.336808	0.231647	0.768353	76.8353
Rad51 C 6h	22.09	0.0142					Rad51 C 6h	23.66	0.00307
