# Supplementary material for: Global chromatin mobility induced by a DSB is dictated by chromosomal conformation and defines the HR outcome
Source: eLife. 2022 Sep 20;11:e78015. doi: 10.7554/eLife.78015 (PMC9489209; doi:10.7554/eLife.78015)
Supplement: Supplementary file 1. [file elife-78015-supp1.xlsx]

## Sheet: Feuil1
Strain	Time of Galactose induction (h)	+/- DSB +/- (dCen)	DSB position	Number of analysed cells	a factor (10^-1)	Diffusion Coefficient (10^-3)	MSD at ∆t=10s (µm2)
WT	3h	- DSB	C	805	6.1939	4.0631	0.0654
	4h			309	5.8338	3.4924	0.0547
	5h			768	5.8685	3.4682	0.0529
	3h	+ DSB	C	831	6.0964	4.3414	0.0688
	4h			741	5.9248	3.9099	0.0628
	5h			799	6.0357	4.2678	0.0698
	6h	- DSB	C	1176	5.9899	3.2381	0.0523
			L	1794	6.381	2.9657	0.0537
			S	1009	6.2244	2.8988	0.0502
		- DSB + dCen plasmid	C	383	5.87	2.87	0.0407
			L	405	6.21	2.85	0.0464
			S	542	6.09	2.76	0.041
		+ DSB	C	1186	6.3511	4.775	0.0868
			L	1227	6.701	2.8483	0.0563
			S	861	6.2111	2.8471	0.0524
		+ DSB + dCen plasmid	C	795	6.3559	4.8164	0.0878
			L	764	6.6012	4.5616	0.0873
			S	580	6.9331	4.3426	0.0869
		+ DSB + chromosomal donor @ 5kb	S	1403	5.97	3.87	0.0596
		+ DSB + chromosomal donor @ 300kb	S	1496	6.28	3.21	0.0501
	12h	- DSB	C	1640	6.0975	2.988	0.0494
		+ DSB		612	6.2306	5.9604	0.101
		+ DSB + dCen plasmid (white cells )		584	5.9599	5.3975	0.0822
		+ DSB + dCen plasmid (red cells )		519	6.1511	4.0708	0.0641
H2A S129A	6h	- DSB	C	352	5.6707	3.8812	0.0594
		+ DSB		308	5.6807	4.2765	0.064
		+ DSB + dCen plasmid		205	5.6091	4.2543	0.0635
		- DSB	S	88	5.0551	4.186	0.0534
		+ DSB		192	4.8288	4.3518	0.0549
		+ DSB + dCen plasmid		158	4.971	4.1797	0.0561
H2AS129E	6h	- DSB	C	925	6.32	4.4445	0.0756
		+ DSB		143	6.12	4.61	0.0796
		+ DSB + dCen plasmid		200	6.077	5.12	0.0859
		- DSB	S	90	5.63	4.71	0.0743
		+ DSB		126	5.81	5.0663	0.0829
		+ DSB + dCen plasmid		176	5.75	4.41	0.0737
△rad51	6h	- DSB	C	235	5.44	3.63	0.052
		+ DSB		416	5.79	5.73	0.0858
		+ DSB + dCen plasmid		218	6.03	4.84	0.088
		- DSB	S	116	5.44	3.63	0.0504
		+ DSB		368	5.53	3.96	0.0567
		+ DSB + dCen plasmid		244	5.48	3.68	0.0489
△rad9	6h	- DSB	C	590	5.9753	3.8363	0.061
		+ DSB		380	6.0404	5.2471	0.081
		+ DSB + dCen plasmid		452	5.9038	4.9724	0.076
		- DSB	S	176	5.07	3.36	0.0446
		+ DSB		103	4.99	3.71	0.0484
		+ DSB + dCen plasmid		98	4.88	3.05	0.0446
