# Supplementary material for: Global chromatin mobility induced by a DSB is dictated by chromosomal conformation and defines the HR outcome
Source: eLife. 2022 Sep 20;11:e78015. doi: 10.7554/eLife.78015 (PMC9489209; doi:10.7554/eLife.78015)
Supplement: Supplementary file 3. [file elife-78015-supp3.xlsx]

## Sheet: Feuil1
name	5'-3' sequence
OEA 307	gggcgaattcATGGTGAGCAAGGGCGA
OEA 308	gggcggatccCTACTTGTACAGCTCGTCCATG
OEA 310	TAGGATACAGTTCTCACATCACATCCGAACATAAACAACCATGGTGAGCAAGGGCGA
OEA 311	ATGACAAGTTCTTGAAAACAAGAATCTTTTTATTGTCAGTCTACTTGTACAGCTCGTCCATG
OEA 312	ctgaagggcgagatcaagc
OEA 313	ctcgttgtgggaggtgatgt
OEA 325	gatcCTTCTCAAGAATTATAAGAT
OEA 326	aaacATCTTATAATTCTTGAGAAG
OEA 327	gatcTTACAGTTCTTGAGAAGCTT
OEA 328	aaacAAGCTTCTCAAGAACTGTAA
